# Supplementary material
Source: publisher site journal article supplement (https://www.e-cmh.org/upload/media/cmh-2023-0515-Supplementary-Table-3.pdf)
Supplement: Supplementary file 1 [file cmh-2023-0515-Supplementary-Table-3.pdf]

**Supplementary Table 3.** Cancer incidence rates in patients with pure MASLD (n=1,381)

| All cancers              | Past history<br>Numbers (CR) | Present history<br>New cases | Present history<br>Recurrence |
|--------------------------|------------------------------|------------------------------|-------------------------------|
| Thyroid                  | 2 (3)                        | 6                            | 0                             |
| Digestive system         |                              |                              |                               |
| Esophagus                | 1 (1)                        | 0                            | 0                             |
| Stomach                  | 3 (3)                        | 10                           | 0                             |
| Colon and rectum         | 6 (10)                       | 8                            | 0                             |
| Hepatocellular carcinoma | 7 (2)                        | 37                           | 1                             |
| Pancreas                 | 2 (0)                        | 2                            | 0                             |
| Biliary                  | 3 (1)                        | 4                            | 2                             |
| Lung                     | 0 (3)                        | 5                            | 2                             |
| Breast                   | 19 (19)                      | 16                           | 3                             |
| Kidney and renal pelvis  | 1 (2)                        | 2                            | 0                             |
| Bladder                  | 0 (0)                        | 3                            | 0                             |
| Uterus, cervical, ovary  | 13 (13)                      | 5                            | 1                             |
| Prostate                 | 4 (5)                        | 4                            | 0                             |
| Non-Hodgkin lymphoma     | 3 (1)                        | 5                            | 1                             |
| Leukemia                 | 0 (3)                        | 0                            | 1                             |

MASLD, metabolic dysfunction-associated steatotic liver disease; CR, complete remission.
